# Supplementary material
Source: publisher site journal article supplement (https://www.kjim.org/upload/media/kjim-2025-171-Supplementary-Table-15.pdf)
Supplement: Supplementary file 1 [file kjim-2025-171-Supplementary-Table-15.pdf]

**Supplementary Table 15. Time persistence effect on hepatic failure development following zoster vaccination**

| Time (yr)    | Events, n (%) | aHR (95% CI)                      |                                   |
|--------------|---------------|-----------------------------------|-----------------------------------|
|              |               | Model 1 <sup>a)</sup>             | Model 2 <sup>b)</sup>             |
| < 1          |               |                                   |                                   |
| Unvaccinated | 228 (0.03)    | 1.0 (reference)                   | 1.0 (reference)                   |
| Vaccinated   | 142 (0.02)    | 0.62 (0.50 to 0.77)               | 0.62 (0.50 to 0.76) <sup>c)</sup> |
| 1–2          |               |                                   |                                   |
| Unvaccinated | 188 (0.03)    | 1.0 (reference)                   | 1.0 (reference)                   |
| Vaccinated   | 141 (0.02)    | 0.75 (0.60 to 0.93) <sup>c)</sup> | 0.75 (0.61 to 0.94) <sup>c)</sup> |
| 2–4          |               |                                   |                                   |
| Unvaccinated | 247 (0.03)    | 1.0 (reference)                   | 1.0 (reference)                   |
| Vaccinated   | 177 (0.02)    | 0.74 (0.61 to 0.90) <sup>c)</sup> | 0.74 (0.61 to 0.90) <sup>c)</sup> |
| 4–6          |               |                                   |                                   |
| Unvaccinated | 118 (0.02)    | 1.0 (reference)                   | 1.0 (reference)                   |
| Vaccinated   | 178 (0.01)    | 0.78 (0.58 to 1.03)               | 0.76 (0.57 to 1.02)               |
| 6–8          |               |                                   |                                   |
| Unvaccinated | 42 (0.01)     | 1.0 (reference)                   | 1.0 (reference)                   |
| Vaccinated   | 24 (0.003)    | 0.74 (0.45 to 1.22)               | 0.73 (0.44 to 1.21)               |
| ≥ 8          |               |                                   |                                   |
| Unvaccinated | 1 (0.0001)    | 1.0 (reference)                   | 1.0 (reference)                   |
| Vaccinated   | 1 (0.0001)    | 1.20 (0.08 to 19.22)              | 0.87 (0.05 to 14.44)              |

aHR, adjusted hazard ratio; CI, confidence interval.

<sup>a)</sup>Models 1: adjusted for age (50–54, 55–59, 60–64, and ≥ 65 years) and sex.<sup>b)</sup>Model 2: adjusted for age (50–54, 55–59, 60–64, and ≥ 65 years); sex; household income (low income, middle income, and high income); region of residence (urban and rural); Charlson comorbidity index (0, 1, and ≥ 2); obesity (underweight [ $< 18.5 \text{ kg/m}^2$ ], normal [ $18.5\text{--}22.9 \text{ kg/m}^2$ ], overweight [ $23.0\text{--}24.9 \text{ kg/m}^2$ ], and obese [ $\geq 25.0 \text{ kg/m}^2$ ]); blood pressure (systolic blood pressure  $< 140 \text{ mmHg}$  and diastolic blood pressure  $< 90 \text{ mmHg}$  and systolic blood pressure  $\geq 140 \text{ mmHg}$  or diastolic blood pressure  $\geq 90 \text{ mmHg}$ ); fasting blood glucose ( $< 100$  and  $\geq 100 \text{ mg/dL}$ ); glomerular filtration rate ( $< 60$ ,  $60\text{--}89$ , and  $\geq 90 \text{ mL/min/1.73 m}^2$ ); smoking status (non-, ex-, and current smoker); alcohol consumption (drinks;  $< 1$ ,  $1\text{--}2$ ,  $3\text{--}4$ , and  $\geq 5$  days per week); aerobic physical activity (sufficient and insufficient); and history of medication use for coronary artery disease, diabetes mellitus, dyslipidemia, and hypertension.<sup>c)</sup>Significant differences ( $p < 0.05$ ).
